# Supplementary material for: Electronic control of H+ current in a bioprotonic device with Gramicidin A and Alamethicin
Source: PubMed Central journal article supplement (PMC5059763; doi:10.1038/ncomms12981), 2016-10-07
Supplement: ncomms12981-s1.pdf [file ncomms12981-s1.pdf]

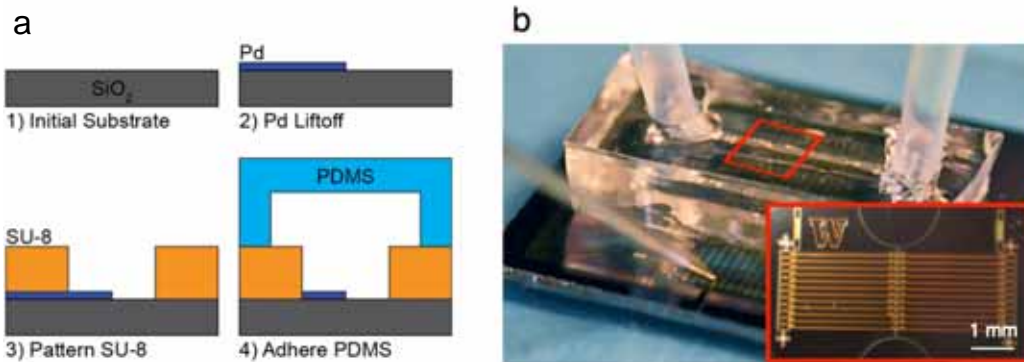

**Supplementary Figure 1 a) Scheme of microfluidic device fabrication by photo and soft lithography,** (a1, a2) 50nm Pd evaporated on Si wafer with 100 nm SiO<sub>2</sub> insulating layer and 5nm Cr as an adhesion layer (a3) A layer of SU-8 photoresist with the thickness of 4μm forms a microfluidic channel. (a4) The device is sealed with a PDMS layer to inlet and outlet port room to insert a Ag/ AgCl electrode (b) Photograph of the bioprotonic microfluidic device; described above, insert is top view.

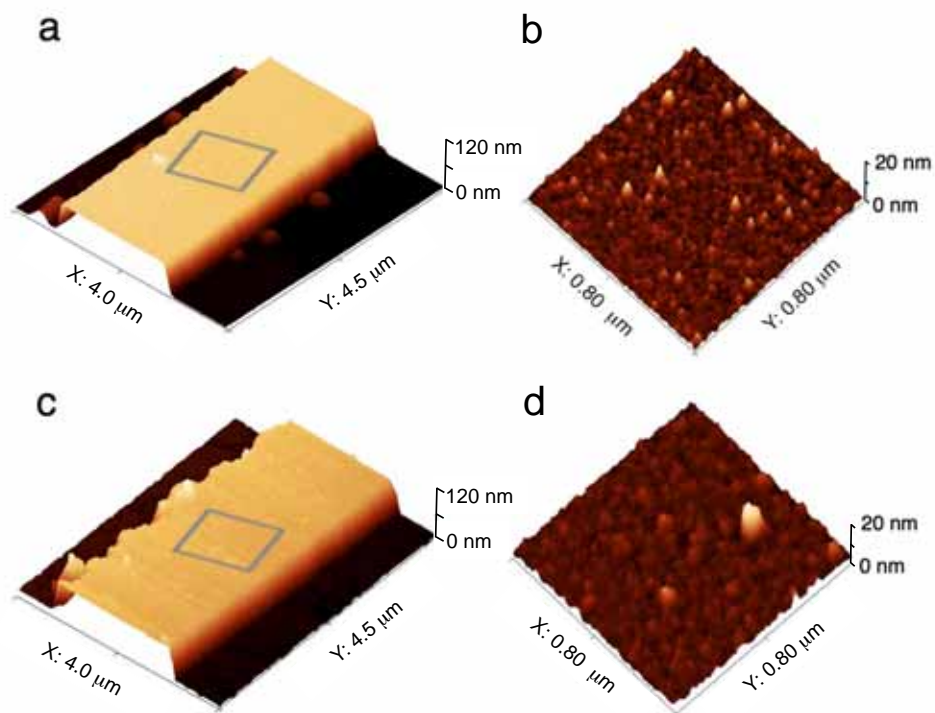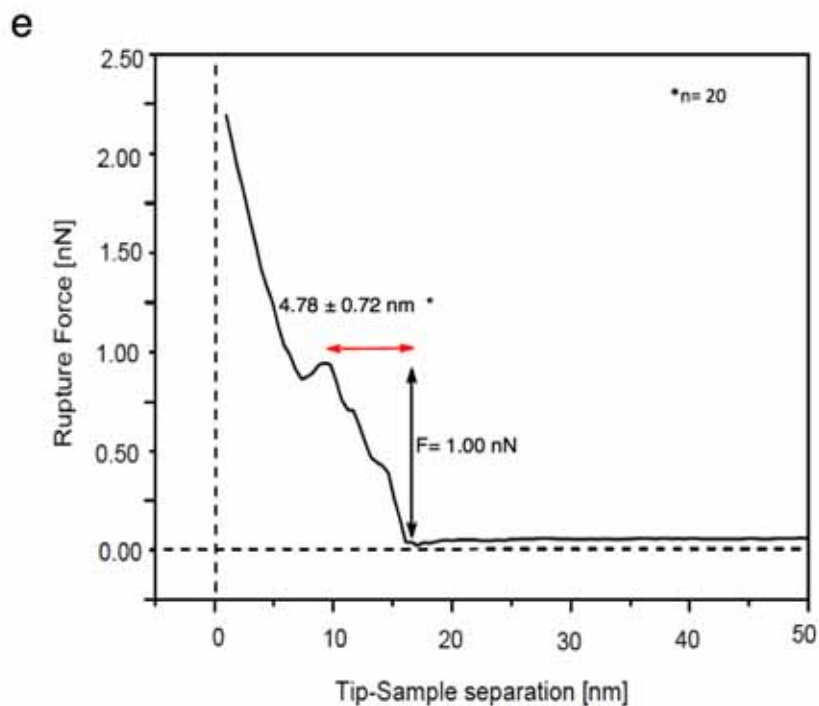

**Supplementary Figure 2 AFM characterization of SLB formation on the Pd contact,** (a) Tapping mode AFM image of a naked Pd contact after O<sub>2</sub> plasma cleaning (b) Zoom in of a naked Pd contact shows an almost flat substrate with a roughness of ca.  $0.5 \pm 0.0$  nm (c) AFM image of Pd contact covered with SLB, (d) Zoom in of a Pd covered with SLB shows increase in roughness of ca.  $0.7 \pm 0.1$  nm (e) A representative force-distance curve for rupture of SLB in liquid following the protocol from literature.<sup>5</sup> The rupture occurs at  $F = 1$  nN,  $F$  is the force between the AFM tip and the sample surface with repulsive force oriented upwards on the y-axis. There is attraction right at a distance at 16.2 nm from the Pd surface by the small dip in the graph, indicating the tip first senses the bilayer. The rupture depth occurs at  $4.8 \pm 0.7$  nm.

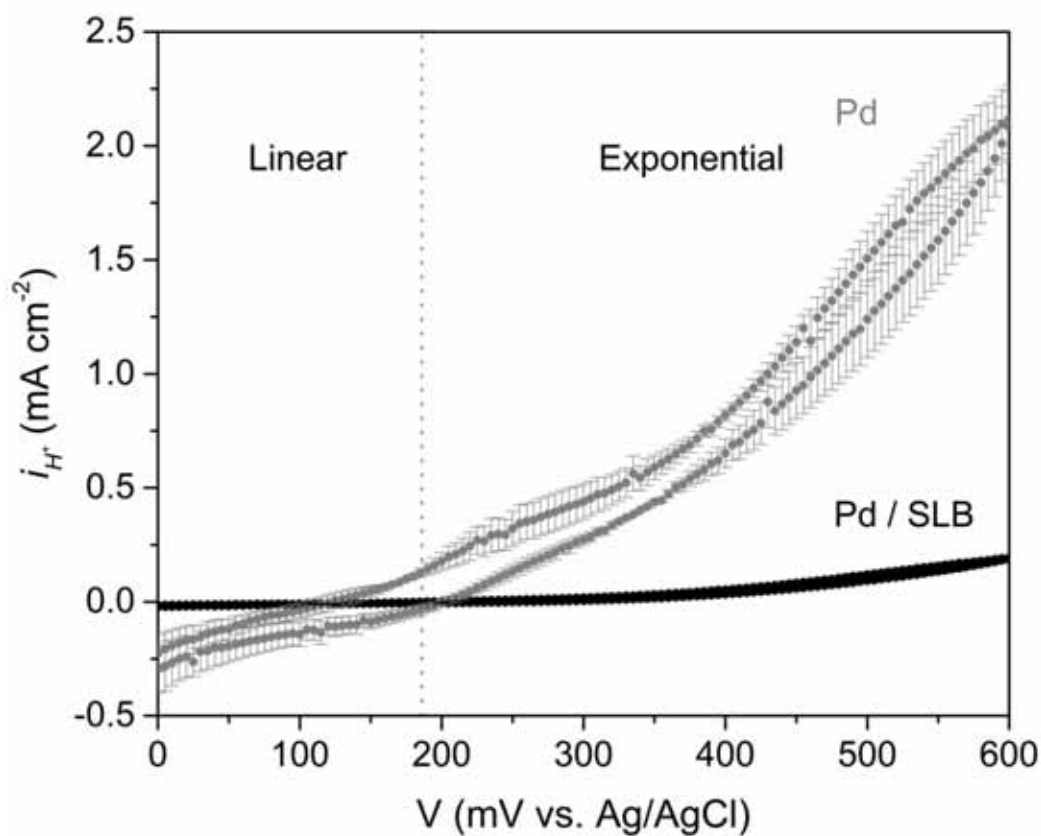

**Supplementary Figure 3 I-V sweep for SLB formation**, the electrical characteristics and integrity of the SLB are characterized with I-V measurements and ferrocyanide ( $[Fe(CN)_6]^{4-}$ ) is used as a redox probe in a two terminal configuration where Ag/AgCl is used as a reference and counter electrode.  $i_{H^+}$  max ( $V=600mV$ ) for the Pd contact covered with the SLB (black trace) is ca.11 times smaller than for the naked Pd contact (gray trace). (The data is collected from 3 different devices with the different dimensions: Pd/ SLB: 3 different devices of  $2\ \mu m \times 50\ \mu m$ , Naked Pd: 2 different devices of  $2\ \mu m \times 50\ \mu m$  and 1 device of  $2\ \mu m \times 20\ \mu m$ . The error bars are the root mean square (RMS) of the displacement of the data from the average value)

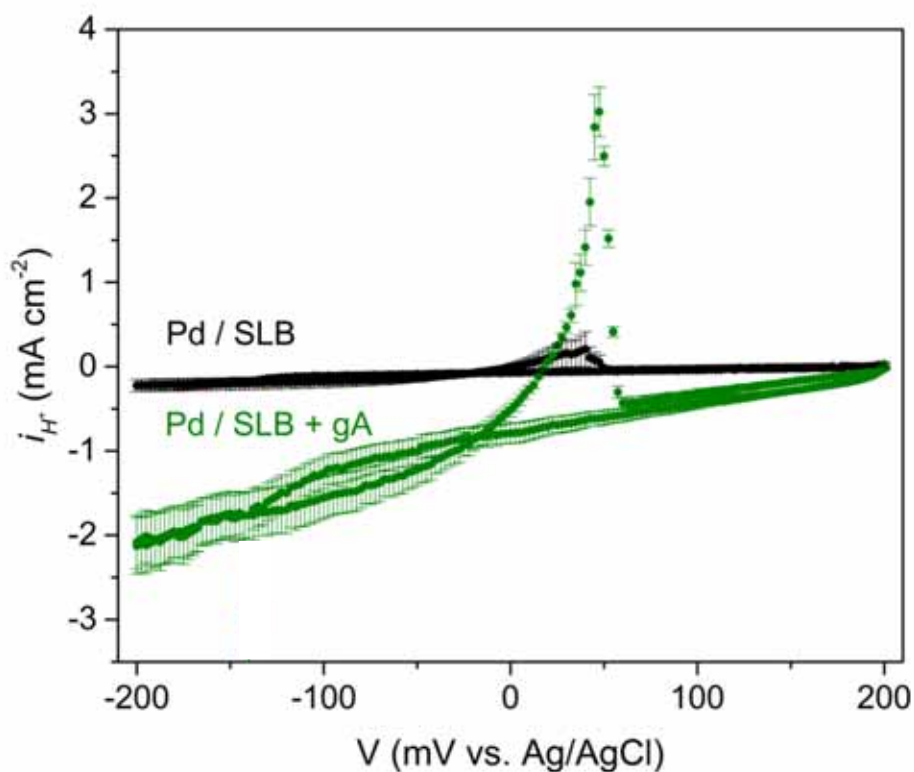

**Supplementary Figure 4 I-V sweep of gA device, Pd / SLB** has low  $i_{H^+} > -0.225$  mA cm<sup>-2</sup> across the entire voltage range, with a small oxidation peak with  $i_{H^+}$  max of ca. 0.2 mA cm<sup>-2</sup>, confirming the high polarization resistance of the SLB (black trace). Bioprotonic devices with integrated gA have higher  $i_{H^+}$  max of ca. 3 mA cm<sup>-2</sup>, with a large PdH<sub>x</sub> oxidation peak at 50 mV<sup>3</sup>, indicating H<sup>+</sup> across the SLB membrane (green trace). (The data is collected from 3 different devices with the different dimensions: Pd/SLB: 3 different devices of 2 μm × 50 μm, Pd/SLB + gA: 2 μm × 20 μm, 2 μm × 50 μm, 2 μm × 70 μm. The error bars are the root mean square (RMS) of the displacement of the data from the average value).

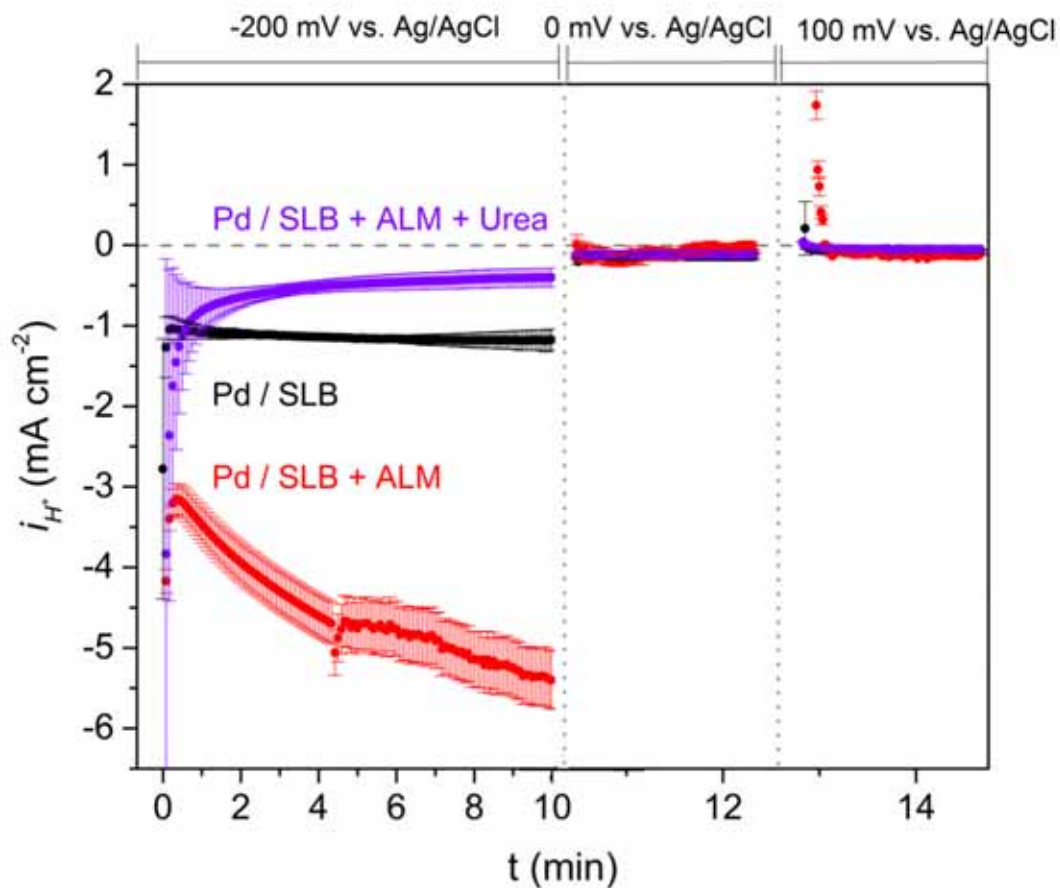

**Supplementary Figure 5 I-t plot of ALM disruption by introducing urea**, Urea disrupts the ALM molecules, removing the ALM channels from the SLB<sup>2</sup>. At  $V = -200$  mV,  $i_{H^+} = -5.5$  mA cm<sup>-2</sup> for SLB+ ALM (red trace) while the channel is open and at  $V = 100$  mV,  $i_{H^+} = 1.9$  mA cm<sup>-2</sup> for SLB+ ALM (red trace). Addition of 40 mM urea to solution disrupts the aggregation of individual ALM monomers, it brings the corresponding  $i_{H^+}$  to  $-0.4$  mA cm<sup>-2</sup> at  $V = -200$  mV (purple trace) and  $i_{H^+} = 0$  mA cm<sup>-2</sup> by the follow up at  $V = 100$  mV (blue trace). (The data is collected from 3 different devices with the different dimensions, Pd/ SLB: 3 different devices of  $2 \mu\text{m} \times 50 \mu\text{m}$ , Pd/ SLB + ALM:  $2 \mu\text{m} \times 20 \mu\text{m}$ ,  $2 \mu\text{m} \times 40 \mu\text{m}$ ,  $2 \mu\text{m} \times 50 \mu\text{m}$ , Pd/ SLB + ALM + Urea:  $2 \mu\text{m} \times 20 \mu\text{m}$ ,  $2 \mu\text{m} \times 40 \mu\text{m}$ ,  $2 \mu\text{m} \times 50 \mu\text{m}$ . The error bars are the root mean square (RMS) of the displacement of the data from the average value)



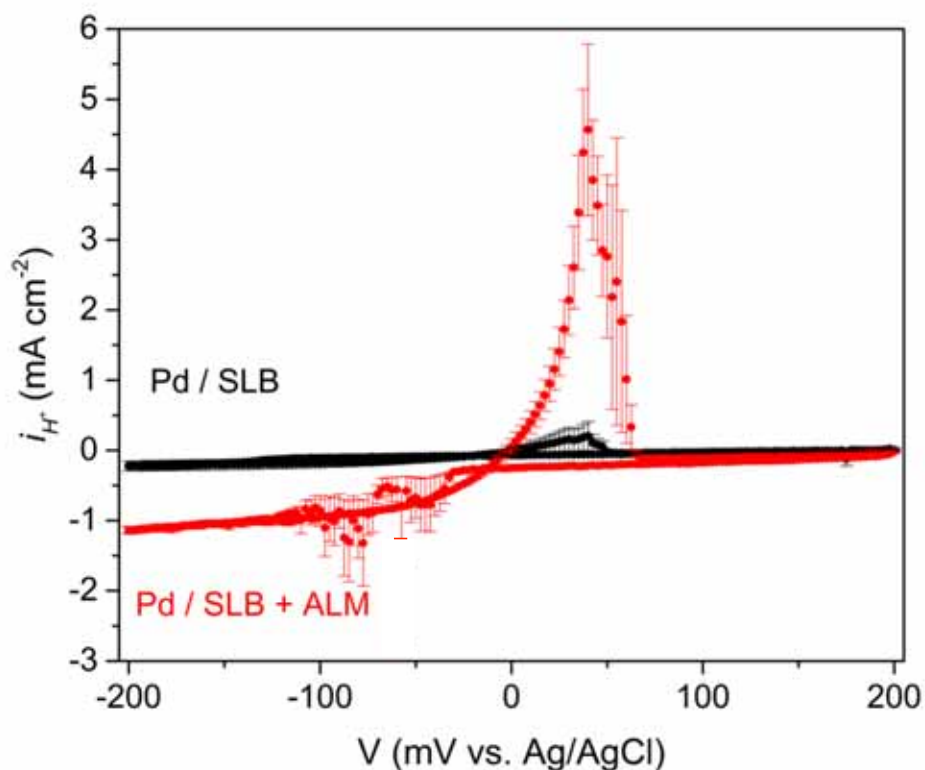

**Supplementary Figure 6 I-V Sweep of ALM voltage-gated device, Pd / SLB** has a low  $i_{H^+} > -0.225 \text{ mA cm}^{-2}$  across the entire voltage range, with a small oxidation peak with  $i_{H^+}$  max of ca.  $0.2 \text{ mA cm}^{-2}$ , confirming the high polarization resistance of the SLB (black trace). Bioprotonic devices with integrated with ALM have similar polarization resistances to SLB at low V due to the high impedance across the SLB membrane when ALM channels are closed. Additionally, we observe a large  $\text{PdH}_x$  oxidation peak with a max  $i_{H^+}$  of ca.  $45 \text{ mA cm}^{-2}$  at  $V = 50 \text{ mV}$ , indicating  $\text{H}^+$  flow across the SLB (red trace). (The data is collected from 3 different devices with the different dimensions, Pd/ SLB: 3 different devices of  $2 \mu\text{m} \times 50 \mu\text{m}$ , Pd/ SLB + ALM:  $2 \mu\text{m} \times 20 \mu\text{m}$ ,  $2 \mu\text{m} \times 40 \mu\text{m}$ ,  $2 \mu\text{m} \times 50 \mu\text{m}$ . The error bars are the root mean square (RMS) of the displacement of the data from the average value).

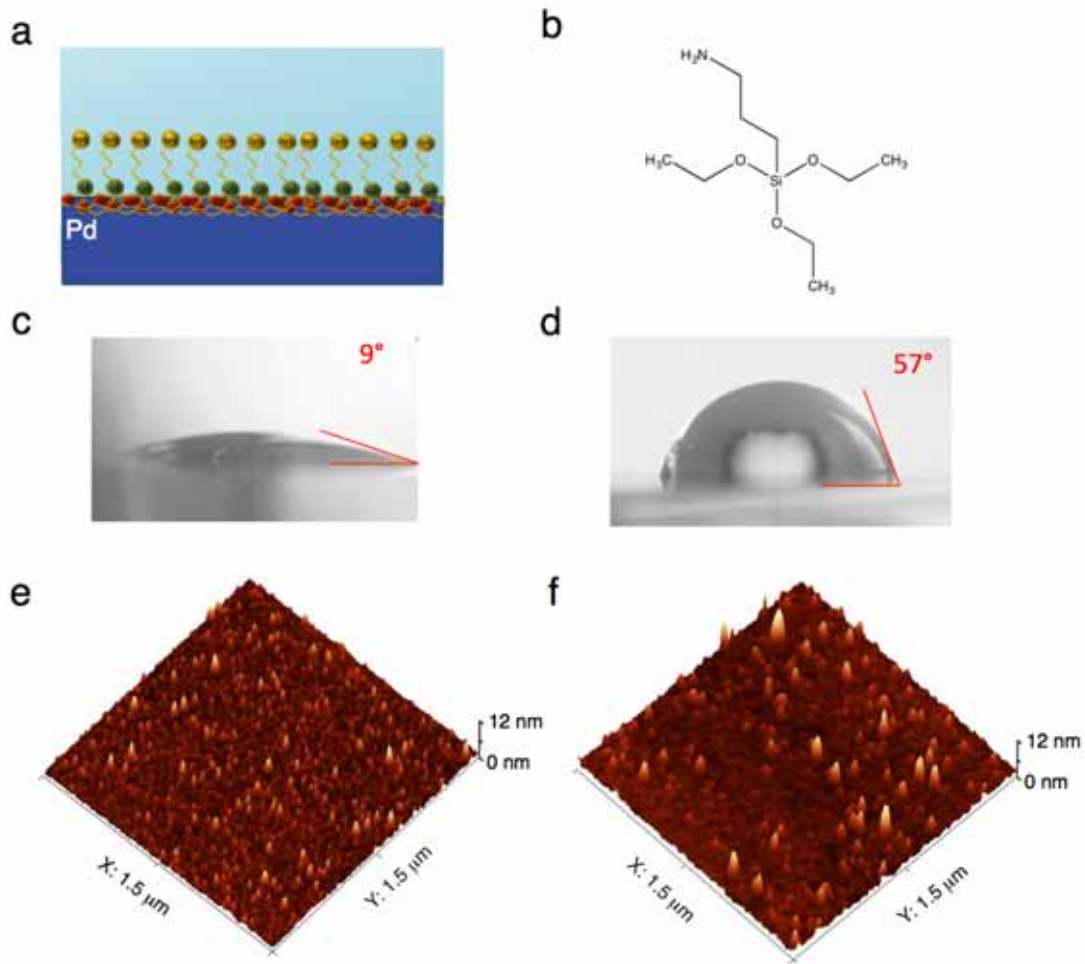

**Supplementary Figure 7 Surface tension and AFM characterization of APTES self-assembly on Pd contact,** (a) Scheme of the Pd device covered with APTES <sup>1</sup> (b) Molecular structure of APTES (c) Surface tension measurements of a naked Pd contact after O<sub>2</sub> plasma cleaning of ca. 9° (d) Surface tension measurements of Pd contact covered by APTES shows increase on the contact angle to ca. 57° (e) AFM image in tapping mode of a naked Pd contact after plasma cleaning, shows an almost flat substrate with a roughness of ca. 0.6 ± 0.1 nm (f) AFM image in tapping mode of the Pd contact covered by APTES shows a decrease in roughness to ca. 0.3 ± 0.1 nm. (n= 3, for the device with dimension of 2 μm × 50 μm).

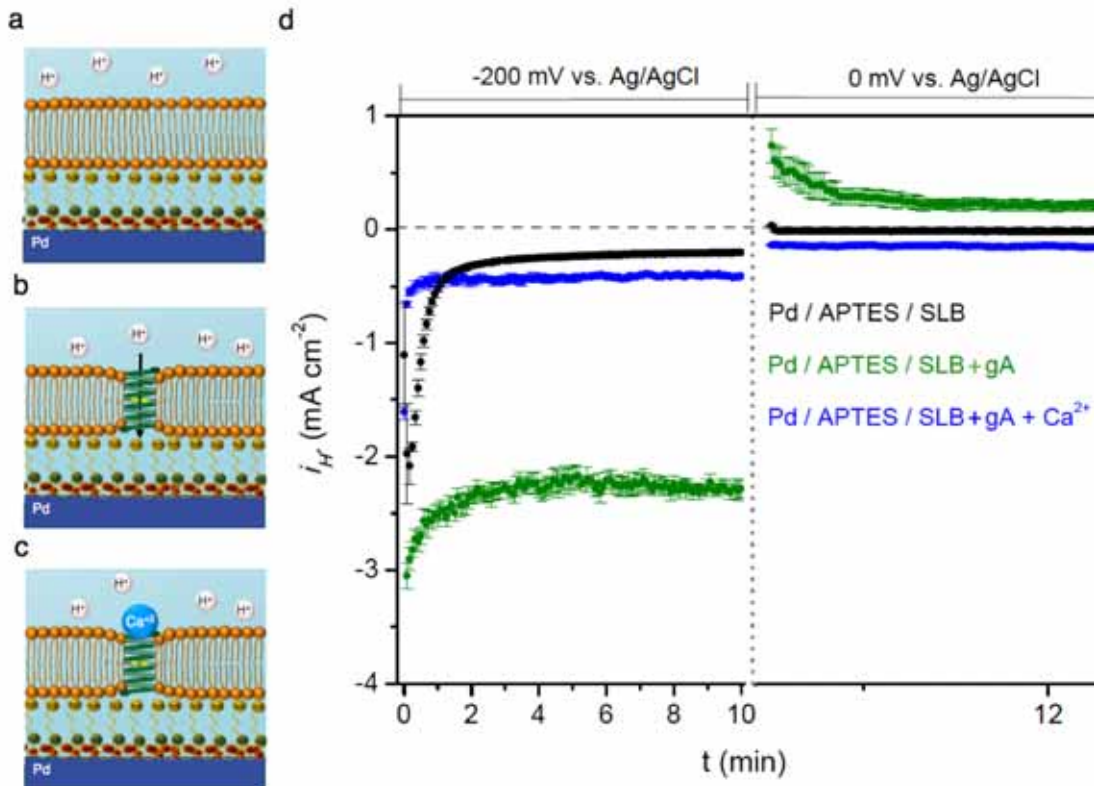

**Supplementary Figure 8 (a, b, c) Schematics of bioprotonic gA devices with the self-assembly of APTES.** (a) Pd contact coated with APTES / SLB. The APTES / SLB inhibits the flux of H<sup>+</sup> from the bulk solution to the Pd/solution interface. (b) Pd contact with APTES / SLB incorporating gA is semipermeable to H<sup>+</sup>, with gA channels facilitating the rapid flow of H<sup>+</sup> to the Pd solution interface (c) Addition of 1 mM Ca<sup>2+</sup> to the bulk solution, blocks gA and prevents the flow of H<sup>+</sup> to the Pd / APTES/ solution interface (d)  $i_{H^+}$ - $t$  plot for  $V = -200$  mV and  $V = 0$  mV for APTES / SLB (black trace) and APTES / SLB + gA (green trace) and APTES / SLB+ gA + Ca<sup>2+</sup> (blue trace) on a Pd contact. (The data is collected from 3 different devices with the different dimensions, Pd/ APTES /SLB: 2  $\mu$ m  $\times$  50  $\mu$ m, and 2 different device of 2  $\mu$ m  $\times$  85  $\mu$ m, Pd/ APTES / SLB + gA: 2  $\mu$ m  $\times$  50  $\mu$ m and 2 different devices of 2  $\mu$ m  $\times$  80  $\mu$ m, Pd/ APTES/ SLB+ gA+ Ca<sup>2+</sup> 2  $\mu$ m  $\times$  50  $\mu$ m and 2 different devices of 2  $\mu$ m  $\times$  80  $\mu$ m. The error bars are the root mean square (RMS) of the displacement of the data from the average value).



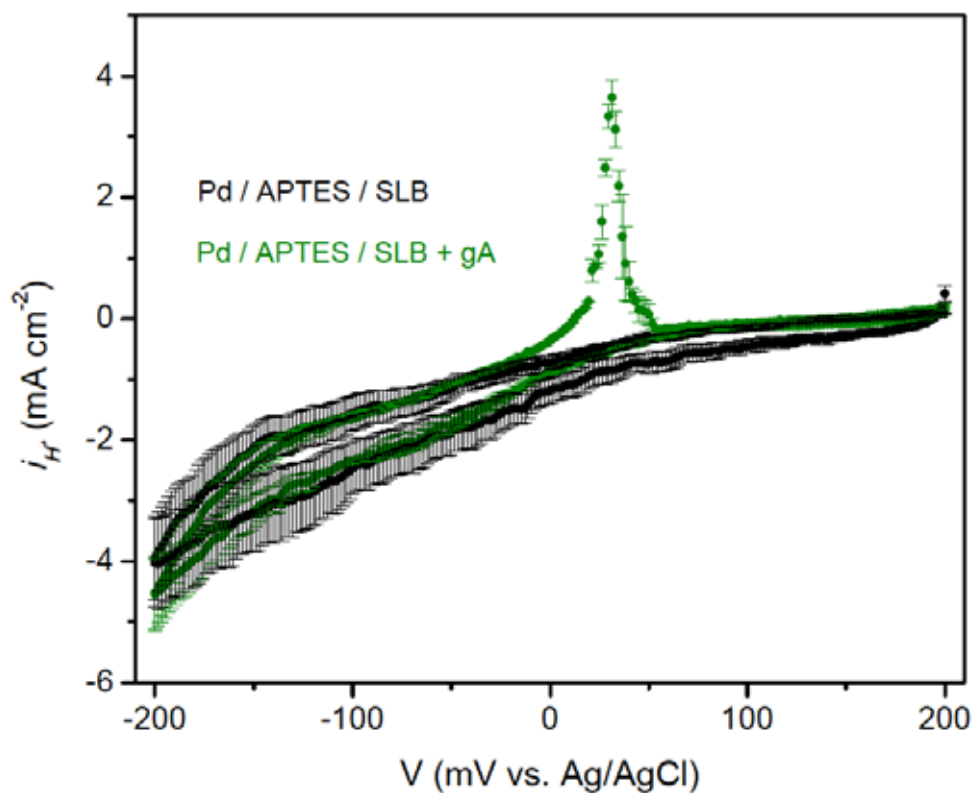

**Supplementary Figure 9 I-V sweep of gA device, Pd / APTES / SLB has  $i_{H^+} > -4\text{mA cm}^{-2}$  across the entire voltage range, without oxidation peak, confirming the high polarization resistance of the APTES / SLB (black trace). Bioprotonic devices with integrated gA have higher  $i_{H^+}$  max of ca.  $4\text{ mA cm}^{-2}$ , with a large  $\text{PdH}_x$  oxidation peak at  $45\text{ mV}^3$ , indicating  $\text{H}^+$  across the APTES / SLB membrane (green trace). (The data is collected from 3 different devices with the different dimensions: Pd/ SLB: 3 different devices of  $2\text{ }\mu\text{m} \times 85\text{ }\mu\text{m}$ , Pd/ SLB + gA:  $2\text{ }\mu\text{m} \times 40\text{ }\mu\text{m}$ ,  $2\text{ }\mu\text{m} \times 50\text{ }\mu\text{m}$ ,  $2\text{ }\mu\text{m} \times 70\text{ }\mu\text{m}$ . The error bars are the root mean square (RMS) of the displacement of the data from the average value).**

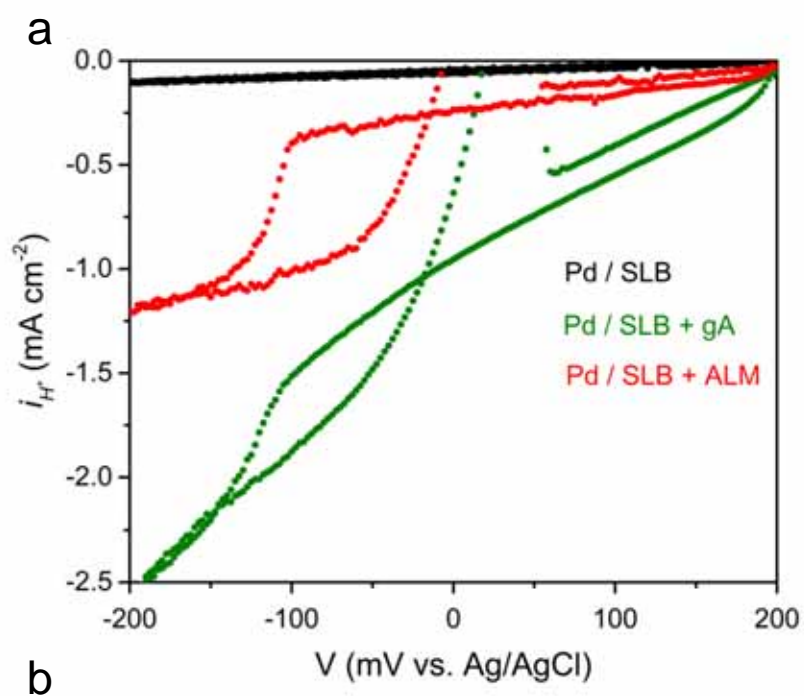

|                                             | Pd / SLB | Pd / SLB + gA | Pd / SLB + ALM |
|---------------------------------------------|----------|---------------|----------------|
| Slope [ $\text{mA cm}^{-2} \text{V}^{-1}$ ] | 0.25436  | 3.91856       | 0.8907         |
| Intercept [ $\text{mA cm}^{-2}$ ]           | 0.05852  | 0.9171        | 0.24632        |
| $i_0$ [ $\text{mA cm}^{-2}$ ]               | 0.00658  | 0.10136       | 0.02304        |

**Supplementary Figure 10** (a) I-V sweep of bioprotonic device with electrochemical redox reaction of  $\text{H}^+$  for the Pd contact with SLB (black trace), Pd contact with SLB + gA (green trace), and Pd contact with SLB + ALM (red trace). (b) Tafel fitting parameters are applied for the low polarization (linear) regime yielding the  $\text{H}^+$  exchange current at the respective electrodes. (The data is collected from the devices with dimension of  $2 \mu\text{m}$ )

| Parameter                        | SLB On Pd contact                |
|----------------------------------|----------------------------------|
| $\beta_{a\text{-bare Pd}}$       | $0.452 \pm 0.093$                |
| $\beta_{a\text{-SLB}}$           | $0.254 \pm 0.025$                |
| $K_{LB}^0$ (cm/s)                | $(6.82 \pm 2.45) \times 10^{-4}$ |
| $K_{SLB}^0 / K_{bare Pd}^0$      | 0.93                             |
| $I_{SLB} / I_{bare Pd}$ (600 mV) | $0.12 \pm 0.03$                  |

**Supplementary Table 1 Tafel parameter on SLB formation by I-V characterization**, the Tafel electrode parameters extracted from the low polarization and exponential regimes. These values show similar ionic insulation as compared with reported electrodes with integrated SLB.<sup>4</sup>

#### Exponential

$$\ln(I) = \ln(FAk^0 C^0) + f\beta(V - V^0)$$

$\beta_a$  = anodic transfer coefficient

$k^0$  = reaction rate constant

$C^0$  = initial concentration

$f = F / RT$

$V^0$  = standard reaction potential of redox probe

#### Linear

$$I = I^0 f(V - V^0)$$

$I^0$  = exchange current density

## Supplementary Note 1

The AFM measurements on SLB formation were performed in liquid using the Bruker liquid cell holder using Bruker's Peak Force method. We used Scan-Asyst fluid cantilevers for all measurements. For topography images, the Bruker's Peak Force method was used with forces always under  $F = 1$  nN, in order to prevent damage to the surface.  $F$  is the force between the AFM tip and the sample surface with repulsive force oriented upwards on the  $y$ -axis and it is calculated by the AFM software based on the cantilever deflection and cantilever spring constant. Distance is measured by Piezo element in the head. For the force-distance measurements, each data ( $n = 20$ , for the device with dimension of  $2 \mu\text{m} \times 50 \mu\text{m}$ ) was collected at a single point on the film, with forces high enough to penetrate the film.

## Supplementary Note 2

Equation 1 to Equation 5:

$$\beta = -2.303([H^+]_{IL} + [OH^-]_{IL} + \sum_{j=0}^n \frac{C_{IL}K_{a,j}[H^+]_{IL}}{(K_{a,j}+[H^+]_{IL})^2}) \quad 6$$

Where the  $[OH^-]_{IL}$  is the hydroxide concentration in the IL ( $[OH^-]_{IL} = K_w/[H^+]_{IL}$ ),  $C_{IL}$  is the concentration of the corresponding buffering acid ( $KH_2PO_4$  or  $H_3PO_4$ ),  $K_a$  is the acid dissociation constant of the buffering acid, and  $\beta$  is the buffer capacity.

We use a standard buffer solution of 5mM PBS and 100mM KCl, resulting in the following pH response:

$$[K_2HPO_4] + [KH_2PO_4] + [H_3PO_4] = 5 \times 10^{-3} \text{ M} \quad (2)$$

$$pH = pK_a + \log \frac{[KA]}{[HA]} \quad (3)$$

Where  $[HA]$  and  $[KA]$  are the conjugate acid and base concentrations in the isolation layer, respectively. We use equation 2 and equation 3 to solve a system of equations that results in equations to calculate each acid concentration as a function of pH:

$$[KH_2PO_4] = \frac{5 \times 10^{-3}}{10^{pH-6.8} + 10^{2.148-pH+1}} \text{ M} \quad (4)$$

$$[H_3PO_4] = \frac{5 \times 10^{pH-5.148}}{10^{pH-6.8} + 10^{2.148-pH+1}} \text{ M} \quad (5)$$

## Supplementary References

- 1 Leonenko, Z., Carnini, A. & Cramb, D. Supported planar bilayer formation by vesicle fusion: the interaction of phospholipid vesicles with surfaces and the effect of gramicidin on bilayer properties using atomic force microscopy. *Biochimica et Biophysica Acta (BBA)-Biomembranes* 1509, 131-147 (2000).
- 2 Mathew, M. K., Nagaraj, R. & Balaram, P. Membrane channel-forming polypeptides. Aqueous phase aggregation and membrane-modifying activity of synthetic fluorescent alamethicin fragments. *Journal of Biological Chemistry* 257, 2170-2176 (1982).
- 3 Chevillot, J.-P., Farcy, J., Hinnen, C. & Rousseau, A. Electrochemical study of hydrogen interaction with palladium and platinum. *Journal of Electroanalytical Chemistry and Interfacial Electrochemistry* 64, 39-62 (1975).
- 4 Misra, N. et al. Bioelectronic silicon nanowire devices using functional membrane proteins. *Proceedings of the National Academy of Sciences* 106, 13780-13784 (2009).
- 5 Attwood, S. J., Choi, Y. & Leonenko, Z. Preparation of DOPC and DPPC supported planar lipid bilayers for Atomic Force Microscopy and Atomic Force Spectroscopy. *International journal of molecular sciences* 14, 3514-3539 (2013).
- 6 The Melanin Binding of Drugs and Its Implications. *Drug Metabolism Reviews* 15, 1183-1212, doi:10.3109/03602538409033561 (1984).
